# Supplementary material
Source: PubMed Central journal article supplement (PMC7300530)
Supplement: MDS3-3-0-s004.pdf [file MDS3-3-0-s004.pdf]

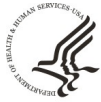

## Acknowledgment Letter

4/20/2020

James Friend  
Medically Advanced Devices Laboratory  
University of California San Diego  
SME344K Matthews Lane, 9500 Gilman Dr. MC0411  
La Jolla, CA 92093-0411  
UNITED STATES

Dear James Friend:

The Center for Devices and Radiological Health (CDRH) of the Food and Drug Administration (FDA) has received your submission. This submission has been assigned the unique document control number below. All future correspondence regarding this submission should be identified prominently with the number assigned and should be submitted to the Document Control Center at the above letterhead address. Failure to do so may result in processing delays. If you believe the information identified below is incorrect, please notify the Program Operations Staff at (301) 796-5640.

Submission Number: PEUA200567  
Received: 4/17/2020  
Applicant: Medically Advanced Devices Laboratory  
Device: MADVent Mark V

We will notify you when the review of this document has been completed or if any additional information is required. If you are submitting new information about a submission for which we have already made a final decision, please note that your submission will not be re-opened. For information about CDRH review regulations and policies, please refer to <http://www.fda.gov/MedicalDevices/DeviceRegulationandGuidance/default.htm>.

Sincerely yours,

Center for Devices and Radiological Health
